# Supplementary material
Source: PubMed Central journal article supplement (PMC5830366)
Supplement: 2017.182360.VALLET_SUPPL.pdf [file 2017.182360.VALLET_SUPPL.pdf]

**Hematopoietic stem cell transplantation for patients with paroxysmal nocturnal hemoglobinuria previously treated with eculizumab: a retrospective study of 21 patients from SFGM-TC centers**

Nicolas Vallet,<sup>1</sup> Flore Sicre de Fontbrune,<sup>2</sup> Michaël Loschi,<sup>3</sup> Deborah Desmier,<sup>4</sup> Alban Villate,<sup>1</sup> Fiorenza Barraco,<sup>5</sup> Patrice Chevallier,<sup>6</sup> Louis Terriou,<sup>7</sup> Ibrahim Yakoub-Agha,<sup>7</sup> Annalisa Ruggeri,<sup>8</sup> Mohamad Mohty,<sup>8</sup> Natacha Maillard,<sup>4</sup> Pierre-Simon Rohrllich,<sup>9</sup> Patrice Ceballos,<sup>10</sup> Stéphanie Nguyen,<sup>11</sup> Xavier Poiré,<sup>12</sup> Gaëlle Guillerm,<sup>13</sup> Reza Tabrizi,<sup>14</sup> Jonathan Farhi,<sup>15</sup> Raynier Devillier,<sup>16</sup> Marie-Thérèse Rubio,<sup>17</sup> Gérard Socié<sup>2</sup> and Régis Peffault de Latour<sup>2</sup> on behalf of the Société Francophone de Greffe de Moelle et Thérapie Cellulaire

<sup>1</sup>Hematology Department, Tours, France; <sup>2</sup>Hematology Department, Saint Louis Hospital, Paris, France; <sup>3</sup>Hematology Department, Rouen, France; <sup>4</sup>Hematology Department, Poitiers, France; <sup>5</sup>Hematology Department, Lyon, France; <sup>6</sup>Hematology Department, Nantes, France; <sup>7</sup>Hematology Department, Lille, France; <sup>8</sup>Hematology Department, Saint Antoine Hospital, Paris, France; <sup>9</sup>Hematology Department, Nice, France; <sup>10</sup>Hematology Department, Montpellier, France; <sup>11</sup>Hematology Department, Pitié Salpêtrière Hospital, Paris, France; <sup>12</sup>Hematology Department, Brussels, Belgium; <sup>13</sup>Hematology Department, Brest, France; <sup>14</sup>Hematology Department, Bordeaux, France; <sup>15</sup>Hematology Department, Angers, France; <sup>16</sup>Hematology Department, Institut Paoli Calmette, Marseille, France and <sup>17</sup>Hematology Department, Nancy, France

Correspondence: regis.peffaultdelatour@aphp.fr  
doi:10.3324/haematol.2017.182360

**Supplementary Annexe:** Collected data focused on the management of eculizumab at time of transplantation.

**ECULIZUMAB BEFORE TRANSPLANTATION:**

Date of last administration: ... .. / ... .. / ... .. (yyyy/mm/dd)

**ECULIZUMAB AFTER TRANSPLANTATION:**

- Discontinuation of eculizumab during transplant:     Yes             No

- eculizumab was used after transplant:                     Yes             No

- If Eculizumab was used after transplantation, what was the indication?

---

---

---

- If eculizumab was used after transplant:

Dose of eculizumab : \_\_\_\_\_

Periodicity of eculizumab infusions : \_\_\_\_\_

Number of infusions: \_\_\_\_\_

Date of last administration: |\_\_|\_|\_| (yyyy/mm/dd)

Reason for Eculizumab discontinuation :

---

---

---

**Table S1:** Supplementary characteristics of patients and conditioning regimens.

| Indications              | #  | Biological findings at transplantation |              | Conditioning regimens |                                                       |             |          |
|--------------------------|----|----------------------------------------|--------------|-----------------------|-------------------------------------------------------|-------------|----------|
|                          |    | PNH clone size (%)                     | Elevated LDH | Type                  | Chemotherapy                                          | ATG (mg/kg) | TBI (Gy) |
| Clonal evolution to MDS  | 1  | 90                                     | Yes          | NMA                   | Flu: 150 mg/m <sup>2</sup><br>Bu: 6 mg/kg             | 5           | -        |
| Recurrent thrombosis     | 2  | 86                                     | Yes          | MAC                   | Bu: 9 mg/kg<br>Cy: 150 mg/kg                          | 5           | -        |
| Aplastic anemia<br>PNH   | 3  | 20                                     | Yes          | NMA                   | Cy: 200 mg/kg                                         | 12.5        | -        |
|                          | 4  | 73                                     | Yes          | NMA                   | Cy: 200 mg/kg                                         | 12.5        | -        |
|                          | 5  | 46                                     | No           | NMA                   | Cy: 200 mg/kg                                         | 12.5        | -        |
|                          | 6  | 84                                     | Yes          | NMA                   | Cy: 200 mg/kg                                         | 11          | -        |
|                          | 7  | 17 <sup>a</sup>                        | No           | NMA                   | Cy: 200 mg/kg                                         | 11.5        | -        |
|                          | 8  | 58                                     | No           | NMA                   | Cy: 200 mg/kg                                         | 12.5        | 2        |
|                          | 9  | 79                                     | No           | NMA                   | Cy: 200 mg/kg                                         | 12.5        | -        |
|                          | 10 | †                                      | No           | NMA                   | Cy:†; Flu:†                                           | -           | -        |
|                          | 11 | 99                                     | No           | NMA                   | Cy 120 mg/kg<br>Flu 120 mg/m <sup>2</sup>             | 15          | 2        |
|                          | 12 | 28                                     | Yes          | NMA                   | Cy 120 mg/kg<br>Flu 120 mg/m <sup>2</sup>             | -           | 2        |
|                          | 13 | 12 <sup>b</sup>                        | †            | NMA                   | Cy 1.2 g/m <sup>2</sup><br>Flu 120 mg/m <sup>2</sup>  | 7.5         | 2        |
| Transfused classical PNH | 14 | 62                                     | No           | NMA                   | Cy 3 g/m <sup>2</sup><br>Flu 150 mg/m <sup>2</sup>    | 10          | -        |
|                          | 15 | 99                                     | No           | NMA                   | Cy 200 mg/kg                                          | 12.5        | -        |
|                          | 16 | 20                                     | No           | NMA                   | Cy 2.250 g/m <sup>2</sup><br>Flu 90 mg/m <sup>2</sup> | -           | -        |

|                                         |    |    |     |     |                                                        |     |   |
|-----------------------------------------|----|----|-----|-----|--------------------------------------------------------|-----|---|
|                                         | 17 | 88 | Yes | NMA | Cy: 30 mg/kg<br>Flu: 120 mg/m <sup>2</sup>             | 10  | - |
|                                         |    | 80 | -   | MAC | Flu: 120 mg/m <sup>2</sup><br>Bu: 12 mg/kg             | 6   | - |
|                                         |    | †  | -   | NMA | Cy: 50 mg/kg<br>Flu: 120 mg/m <sup>2</sup>             | -   | 2 |
|                                         | 18 | 20 | †   | NMA | Cy 1200 mg/m <sup>2</sup><br>Flu 120 mg/m <sup>2</sup> | 7.5 | 2 |
|                                         | 19 | 95 | Yes | NMA | Cy 200 mg/kg<br>Flu 75 mg/m <sup>2</sup>               | 3.7 | 2 |
|                                         |    | 99 | -   | No  | -                                                      | -   | - |
| <b>Non-transfused<br/>classical PNH</b> | 20 | 69 | Yes | NMA | Melphalan 200 mg/m <sup>2</sup>                        | -   | - |
|                                         | 21 | 99 | Yes | MAC | Bu 12 mg/kg<br>Cy 200 mg/kg                            | -   | - |

<sup>a</sup>PNH clone size at diagnosis was 85%; <sup>b</sup>PNH clone size at diagnosis was 58%; †Missing data; ATG: antithymocyte globulin; TBI: Total body irradiation; Flu: Fludarabine; Bu: Busulphan; Cy: Cyclophosphamide
