# Supplementary material
Source: PubMed Central journal article supplement (PMC5830366)
Supplement: 2017_182360-Disclosures_and_Contributions.pdf [file 2017_182360-Disclosures_and_Contributions.pdf]

Haematologica  
HAEMATOL/2017/182360  
Version 3

Hematopoietic stem cell transplantation for patients with paroxysmal nocturnal hemoglobinuria previously treated with Eculizumab: a retrospective study of 21 patients from SFGM-TC centers.

Nicolas Vallet, Flore Sicre de Fontbrune, Michaël Loschi, Deborah Desmier, Alban Villate, Fiorenza Barraco, Patrice Chevallier, Louis Terriou, Ibrahim Yakoub-Agha, Annalisa Ruggeri, Mohamad Mohty, Natacha Maillard, Pierre-Simon Rohrlich, Patrice Ceballos, Steéphanie Nguyen, Xavier Poiré, Gaëlle Guillerm, Reza Tabrizi, Jonathan Farhi, Raynier Devillier, Marie-Thérèse Rubio, Gérard Socié, and Régis Peffault de Latour  
Collaborative Groups: SFGM-TC)

Disclosures: none

Contributions: Conception and design: RPL, GS Collection of data: All authors Assembly of data: NV Data analysis and interpretation: NV, FS, RPL and GS Manuscript writing: NV, FS, RPL and GS Final approval of manuscript: All authors
